# Supplementary material for: Development of Ecofriendly Derivative Spectrophotometric Methods for the Simultaneous Quantitative Analysis of Remogliflozin and Vildagliptin from Formulation
Source: MDPI journal article supplement (doi:10.3390/molecules26206160), 2021-10-12

Calibration Curves for Remogliflozin and Vildagliptin

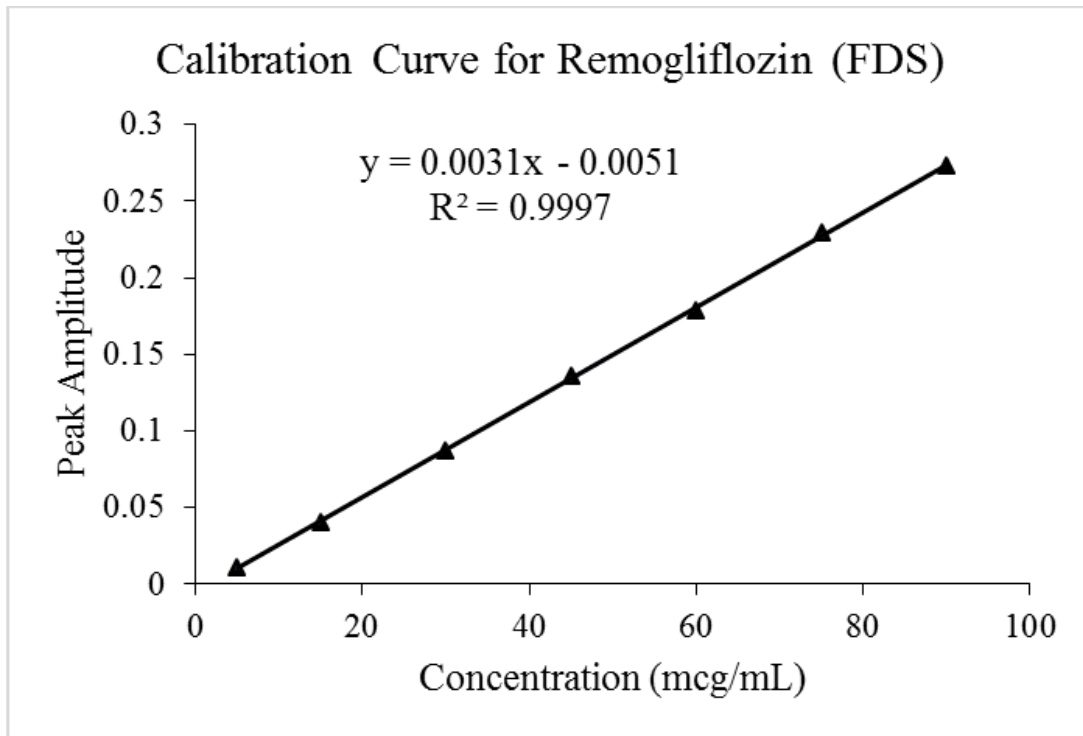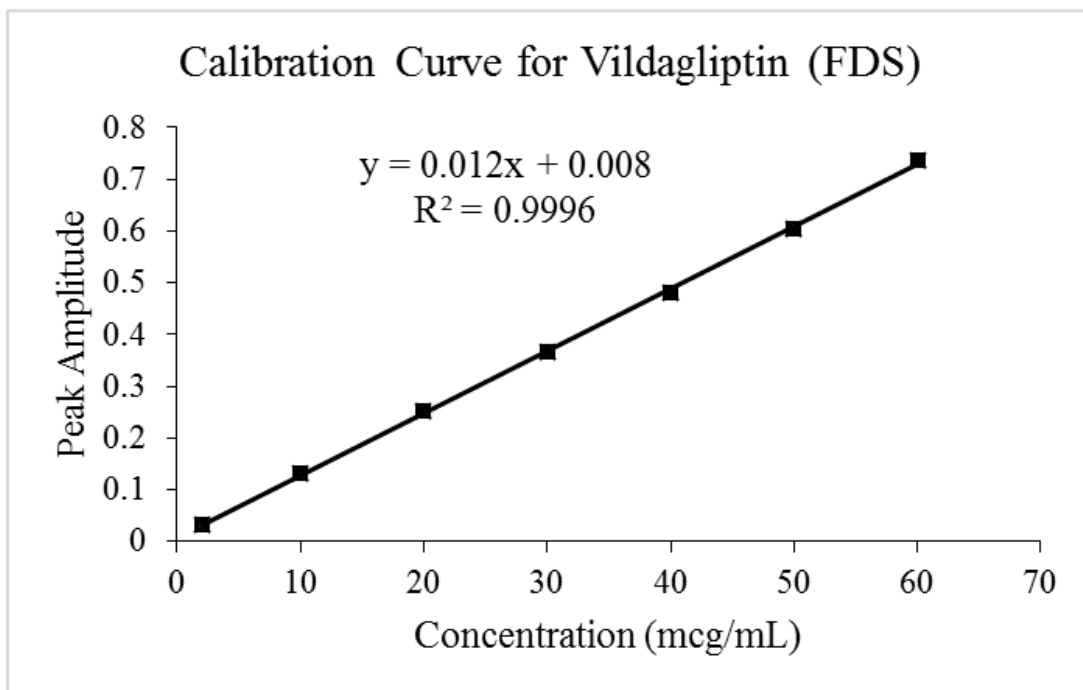

Calibration Curve for Remogliflozin (RDS)

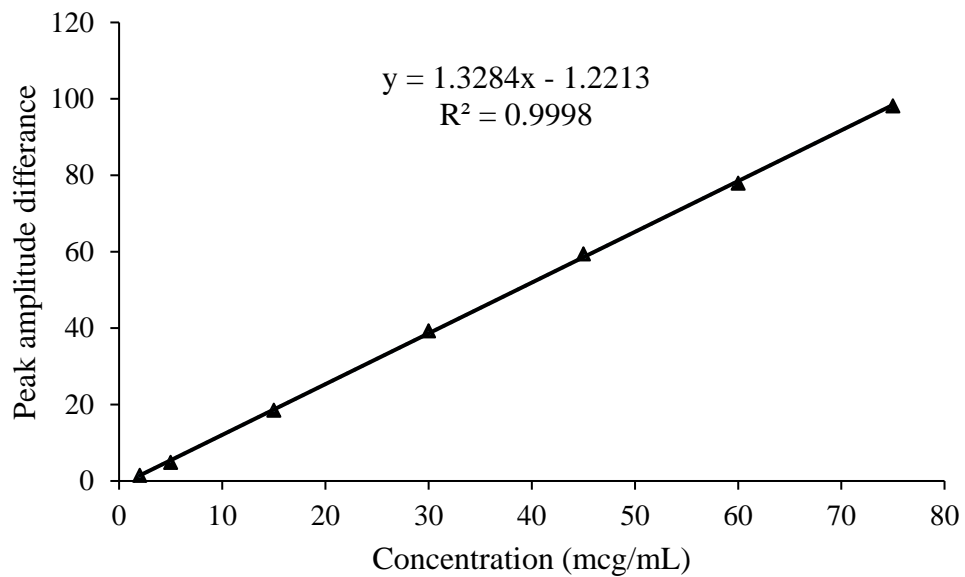

Calibration Curve for Vildagliptin (RDS)

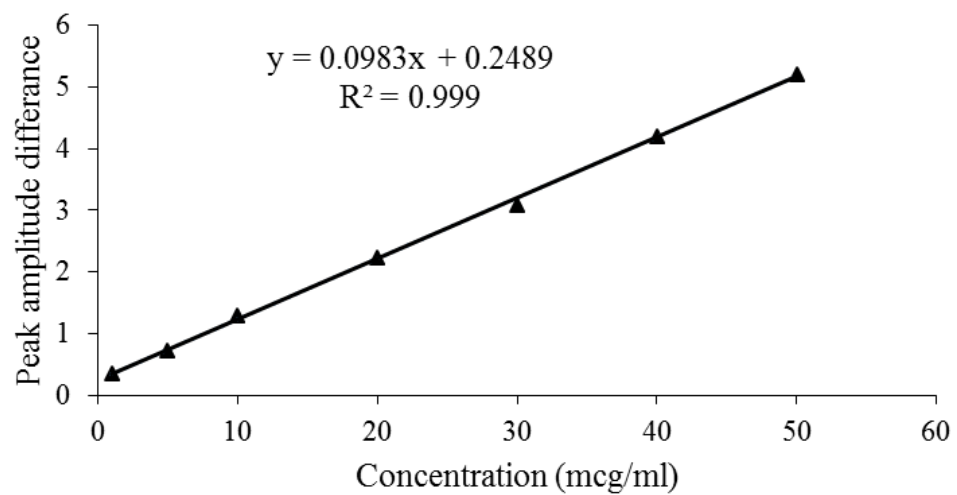

Calibration Curve for Remogliflozin (RFD)

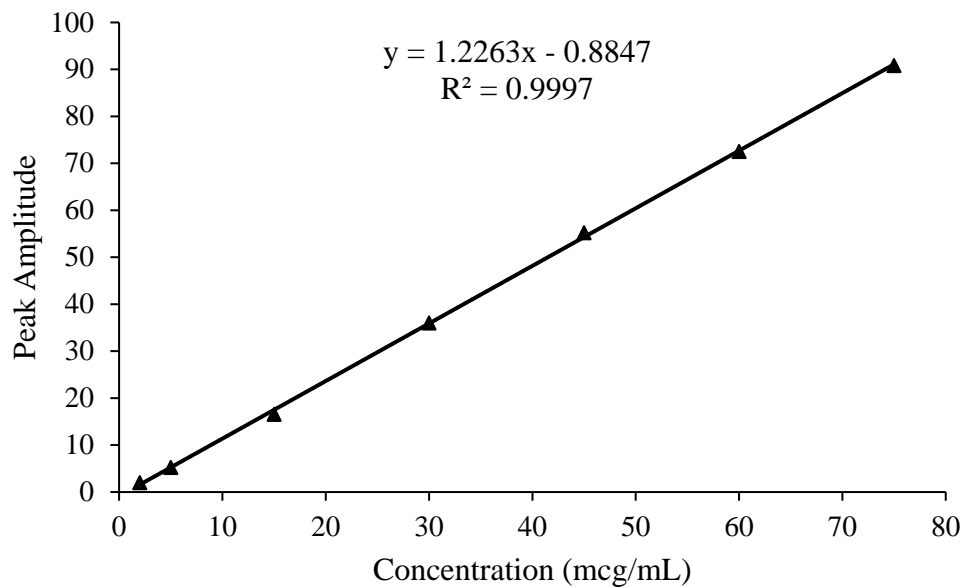

Calibration Curve for Vildagliptin (RFD)

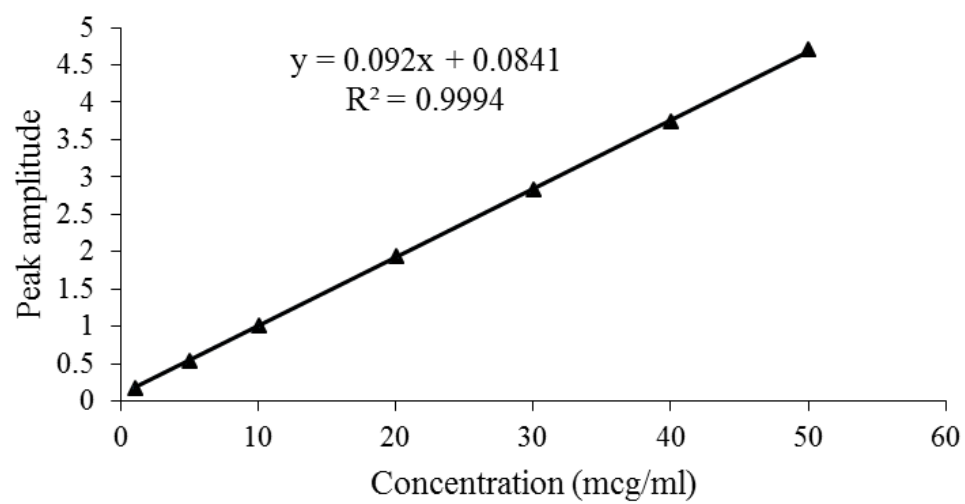

Supplement: s1 [file s1]
