# Supplementary material for: Development of Ecofriendly Derivative Spectrophotometric Methods for the Simultaneous Quantitative Analysis of Remogliflozin and Vildagliptin from Formulation
Source: MDPI journal article supplement (doi:10.3390/molecules26206160), 2021-10-12
Supplement: s1 [file s1]

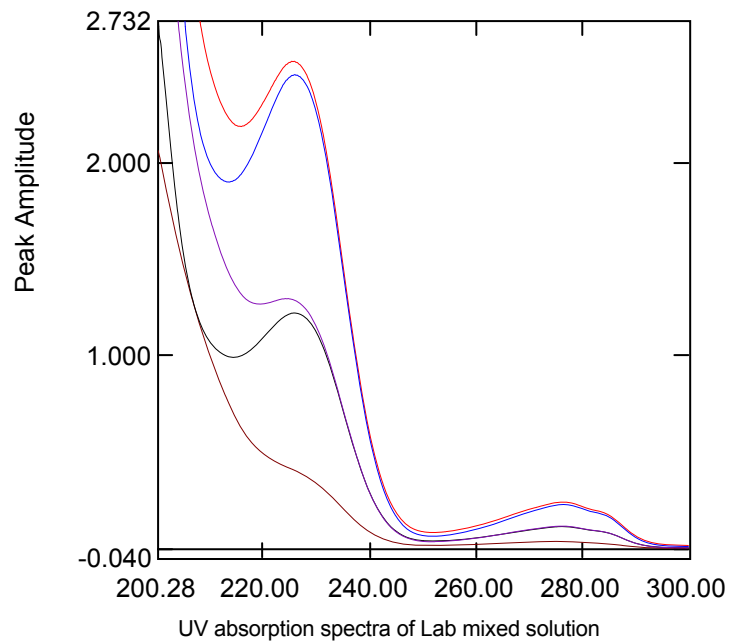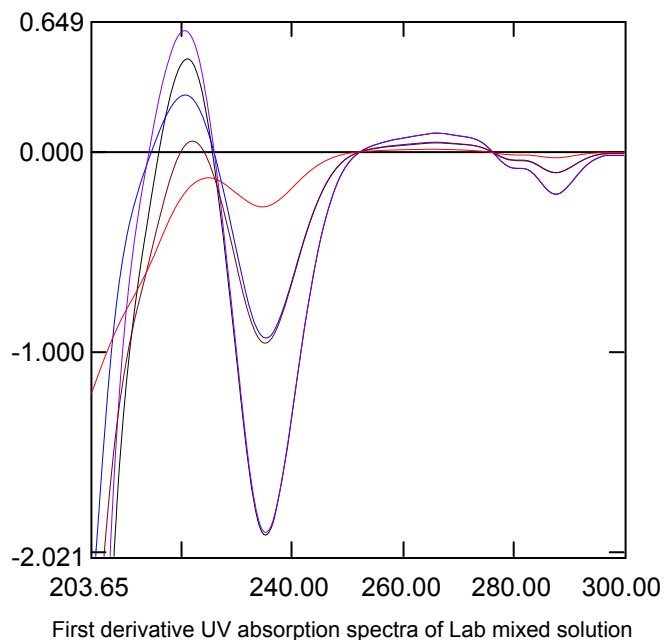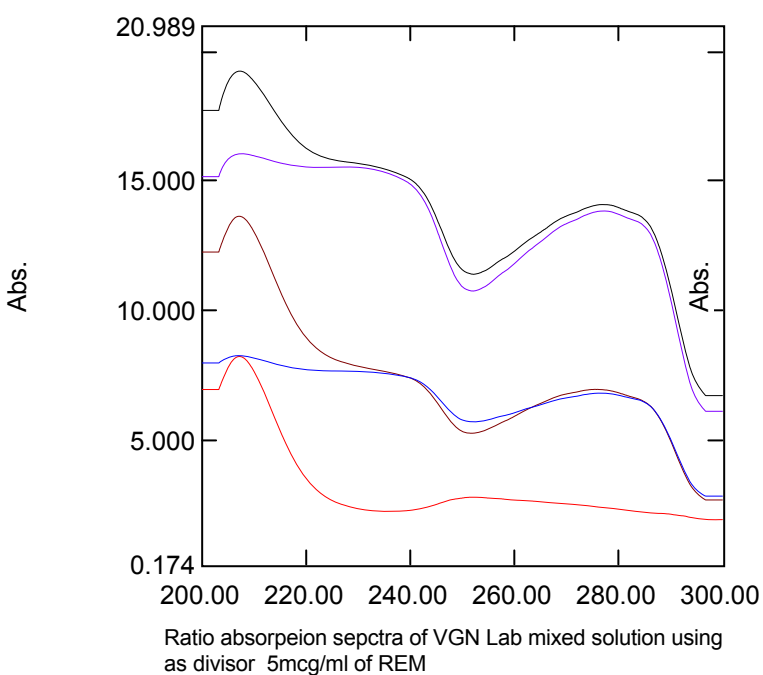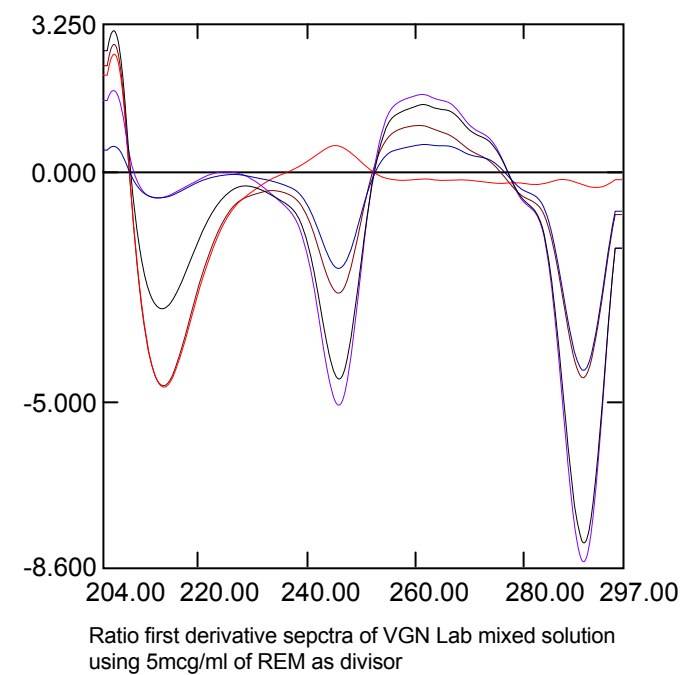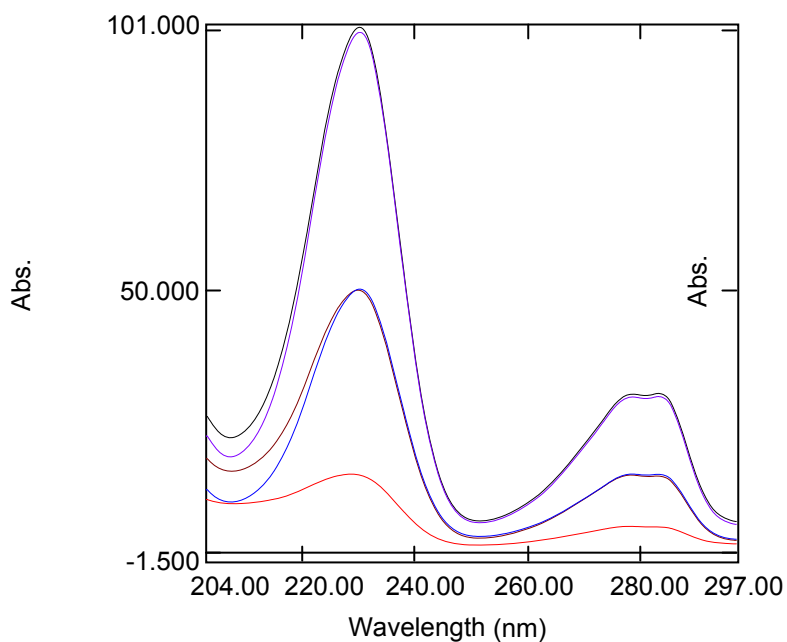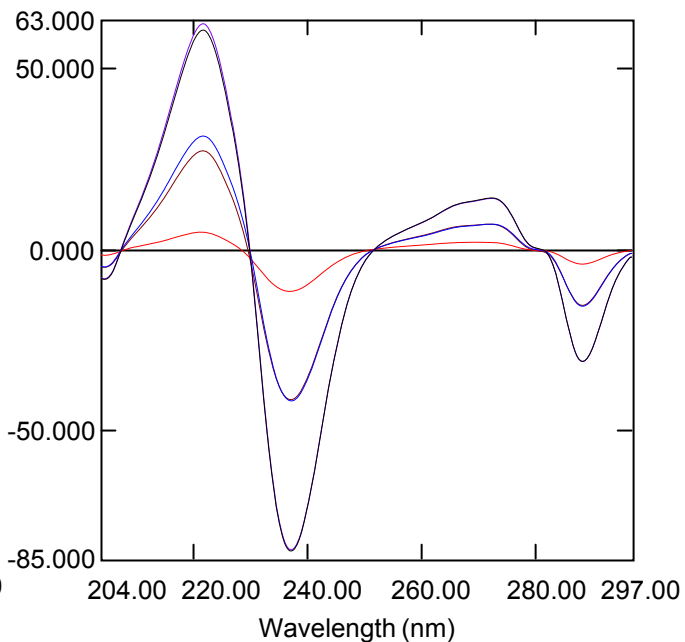

Ratio absorpeion sepctra of RGE Lab mixed solution using 5mcg/ml of VGN as divisor

Ratio first derivative sepctra of RGE Lab mixed solution using 5mcg/ml of VGN as divisor
