# Supplementary material for: Development of Ecofriendly Derivative Spectrophotometric Methods for the Simultaneous Quantitative Analysis of Remogliflozin and Vildagliptin from Formulation
Source: MDPI journal article supplement (doi:10.3390/molecules26206160), 2021-10-12
Supplement: s1 [file s1]

## Supplementary Material

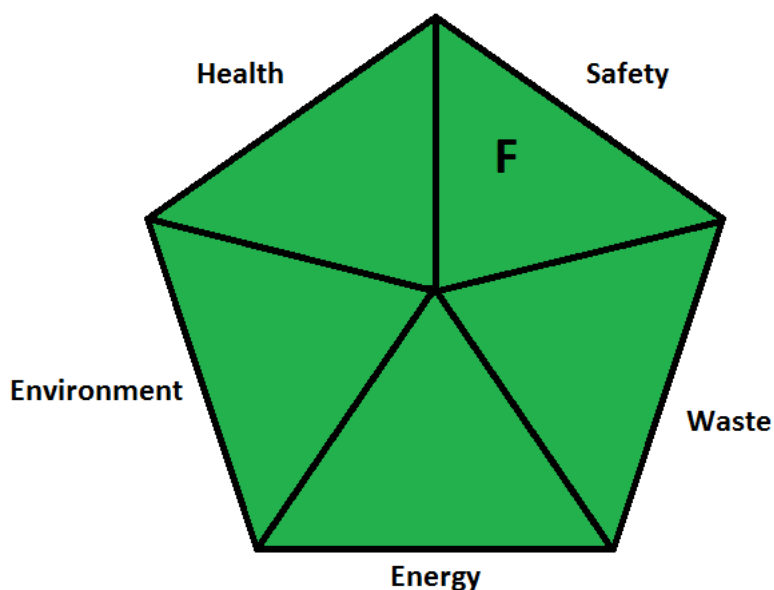

| Category                    | Green                                                                       | Yellow                                                                                 | Red                                                                                          |
|-----------------------------|-----------------------------------------------------------------------------|----------------------------------------------------------------------------------------|----------------------------------------------------------------------------------------------|
| <b>Health Hazard</b>        | Slightly toxic, slight irritant; NFPA health hazard score is 0 or 1.        | Moderately toxic; could cause temporary incapacitation; NFPA = 2 or 3.                 | Serious injury on short term exposure; known or suspected small animal carcinogen; NFPA = 4. |
| <b>Safety Hazard</b>        | Highest NFPA flammability, instability score of 0 or 1. No special hazards. | Highest NFPA flammability or instability score is 2 or 3, or a special hazard is used. | Highest NFPA flammability or instability score is 4.                                         |
| <b>Environmental Hazard</b> | If less than 50 g of environmental hazards used.                            | If more than 50 g but less than 250 g used.                                            | If more than 250 g used.                                                                     |
| <b>Energy</b>               | Wet chemistry method such as titration. Very little solvent evaporation.    | Instrumental method such as GC, HPLC; moderate solvent evaporation.                    | Instrumental method such as GC-MS; high volume of solvent evaporated.                        |
| <b>Waste amount</b>         | Total waste for processing one sample $\leq 50$ g.                          | Total waste $\leq 250$ g.                                                              | Total waste $> 250$ g.                                                                       |

Table S1. Green assessment profile proposed by Raynie et al. [1]

### References

D. Raynie, J. Driver, Green Assessment of Chemical Methods, In: 13th Annual Green Chemistry and Engineering Conference, *Maryland*, 2009.

Table S2: Green analytical procedure Index parameters [2]

| Category                                                                            | Green                                                                         | Yellow                                                                                 | Red                                                                                          |
|-------------------------------------------------------------------------------------|-------------------------------------------------------------------------------|----------------------------------------------------------------------------------------|----------------------------------------------------------------------------------------------|
| <b>Sample preparation</b>                                                           |                                                                               |                                                                                        |                                                                                              |
| Collection (1)                                                                      | In-line                                                                       | On-line or at-line                                                                     | Off-line                                                                                     |
| Preservation (2)                                                                    | None                                                                          | Chemical or physical                                                                   | Physico-chemical                                                                             |
| Transport (3)                                                                       | None                                                                          | Required                                                                               | –                                                                                            |
| Storage (4)                                                                         | None                                                                          | Under normal conditions                                                                | Under special conditions                                                                     |
| Type of method: direct or indirect (5)                                              | No sample preparation                                                         | Simple procedures, eg. filtration, decantation                                         | Extraction required                                                                          |
| Scale of extraction (6)                                                             | Nano-extraction                                                               | Micro-extraction                                                                       | Macro-extraction                                                                             |
| Solvents/reagents used (7)                                                          | Solvent-free methods                                                          | Green solvents/reagents used                                                           | Non-green solvents/reagents used                                                             |
| Additional treatments (8)                                                           | None                                                                          | Simple treatments (clean up, solvent removal, etc.)                                    | Advanced treatments (derivatization, mineralization, etc.)                                   |
| <b>Reagent and solvents</b>                                                         |                                                                               |                                                                                        |                                                                                              |
| Amount (9)                                                                          | < 10 mL (< 10 g)                                                              | 10–100 mL (10–100 g)                                                                   | > 100 mL (> 100 g)                                                                           |
| Health hazard (10)                                                                  | Slightly toxic, slight irritant; NFPA health hazard score = 0 or 1.           | Moderately toxic; could cause temporary incapacitation; NFPA = 2 or 3.                 | Serious injury on short-term exposure; known or suspected small animal carcinogen; NFPA = 4. |
| Safety hazard (11)                                                                  | Highest NFPA flammability or instability score of 0 or 1. No special hazards. | Highest NFPA flammability or instability score of 2 or 3, or a special hazard is used. | Highest NFPA flammability or instability score of 4.                                         |
| <b>Instrumentation</b>                                                              |                                                                               |                                                                                        |                                                                                              |
| Energy (12)                                                                         | ≤0.1 kWh per sample                                                           | ≤1.5 kWh per sample                                                                    | > 1.5 kWh per sample                                                                         |
| Occupational hazard (13)                                                            | Hermetic sealing of analytical process                                        | –                                                                                      | Emission of vapours to the atmosphere                                                        |
| Waste (14)                                                                          | < 1 mL (< 1 g)                                                                | 1–10 mL (1–10 g)                                                                       | > 10 mL (< 10 g)                                                                             |
| Waste treatment (15)                                                                | Recycling                                                                     | Degradation, passivation                                                               | No treatment                                                                                 |
| <b>ADDITIONAL MARK: QUANTIFICATION</b>                                              |                                                                               |                                                                                        |                                                                                              |
| Circle in the middle of GAPI: <i>Procedure for qualification and quantification</i> | No circle in the middle of GAPI: <i>Procedure only for qualification</i>      |                                                                                        |                                                                                              |
| NFPA: National Fire Protection Association                                          |                                                                               |                                                                                        |                                                                                              |

## References

- 1 Van Aken, K.; Streckowski, L.; Patiny, L. EcoScale, A semi-quantitative tool to select an organic preparation based on economical and ecological parameters. *Beilstein J. Org. Chem.* **2006**, *2*, 1–7.
- 2 Płotka-Wasyłka, J. A new tool for the evaluation of the analytical procedure: Green Analytical Procedure Index. *Talanta* **2018**, *181*, 204–209.
