# Supplementary figures and images for: Development of Ecofriendly Derivative Spectrophotometric Methods for the Simultaneous Quantitative Analysis of Remogliflozin and Vildagliptin from Formulation
Source: MDPI journal article supplement (doi:10.3390/molecules26206160), 2021-10-12

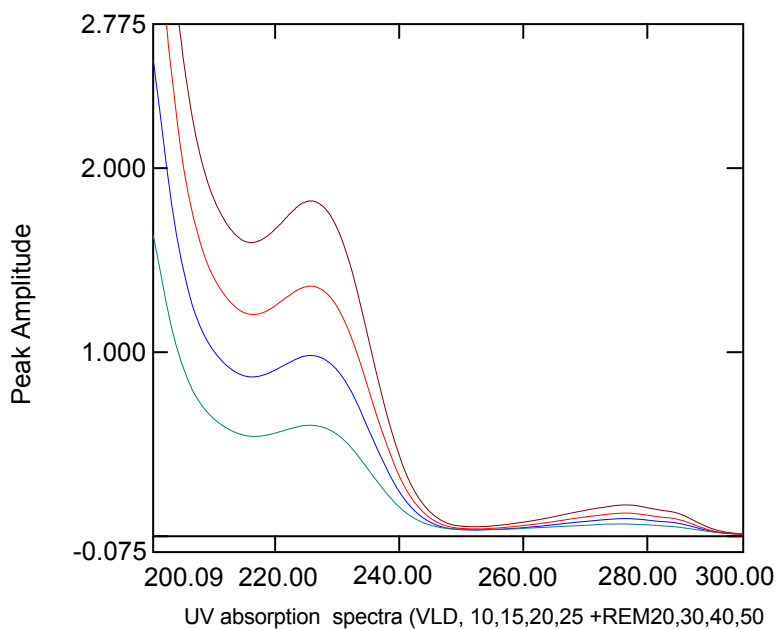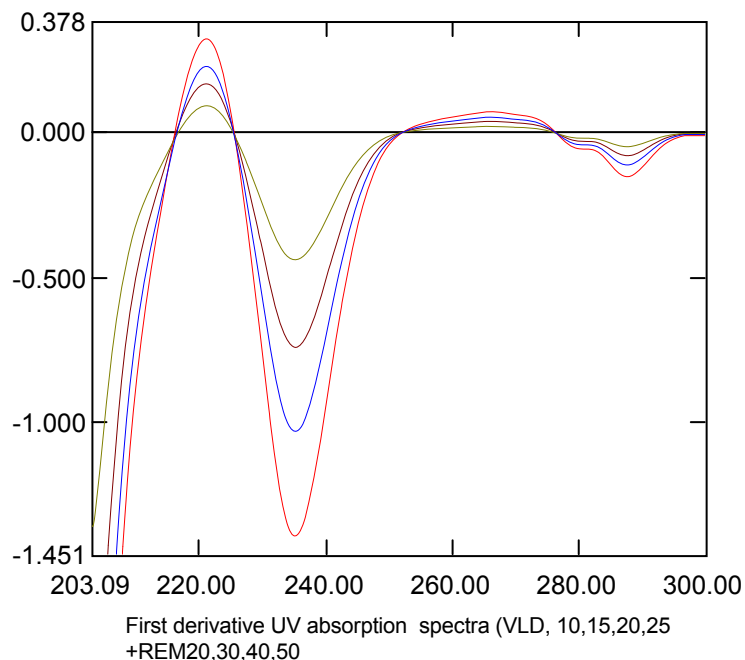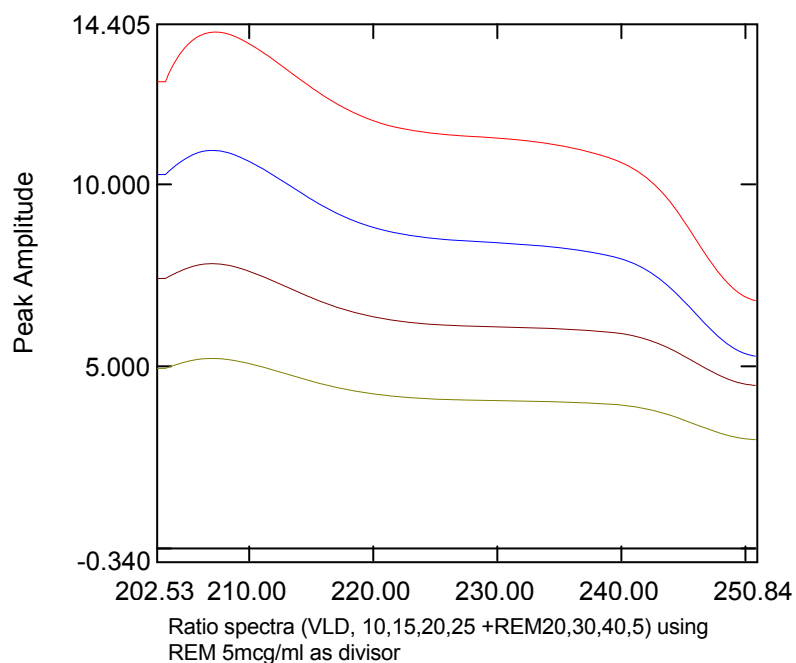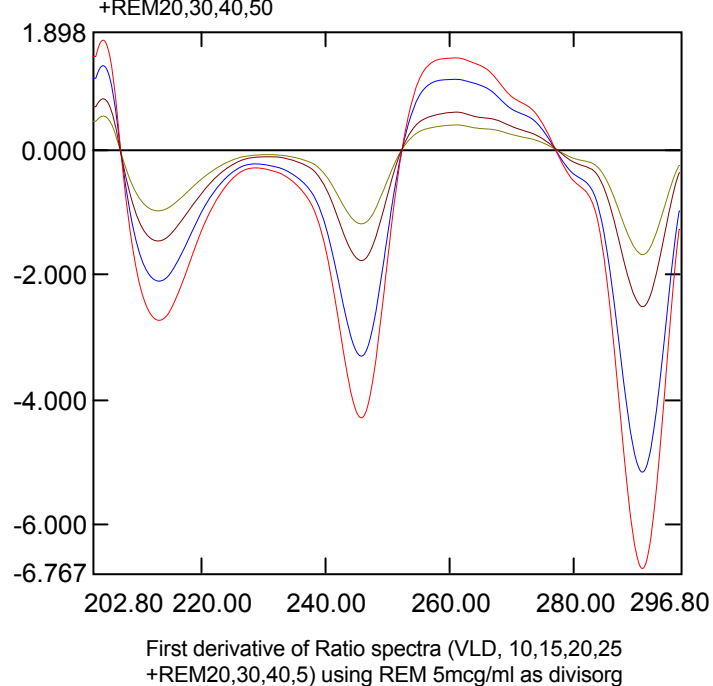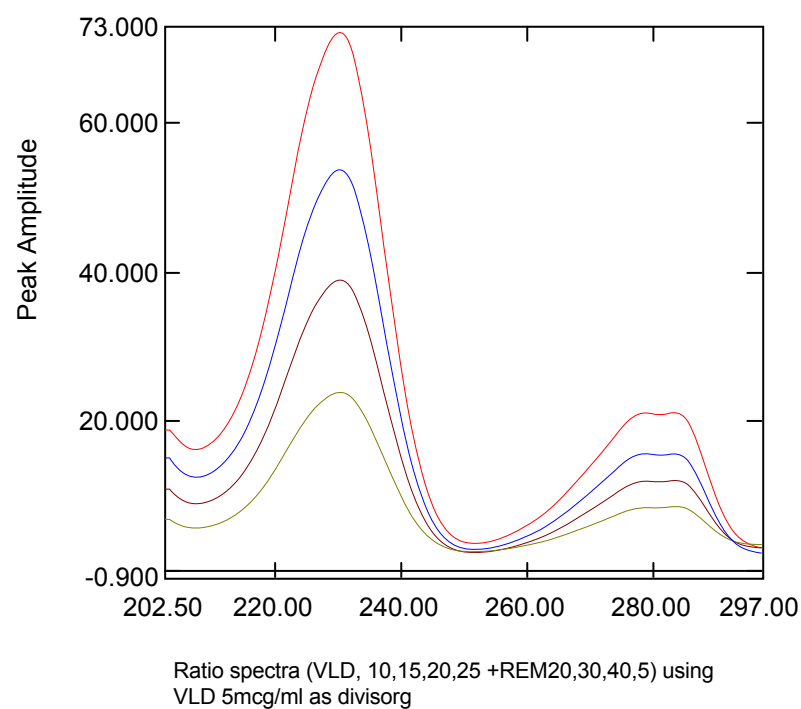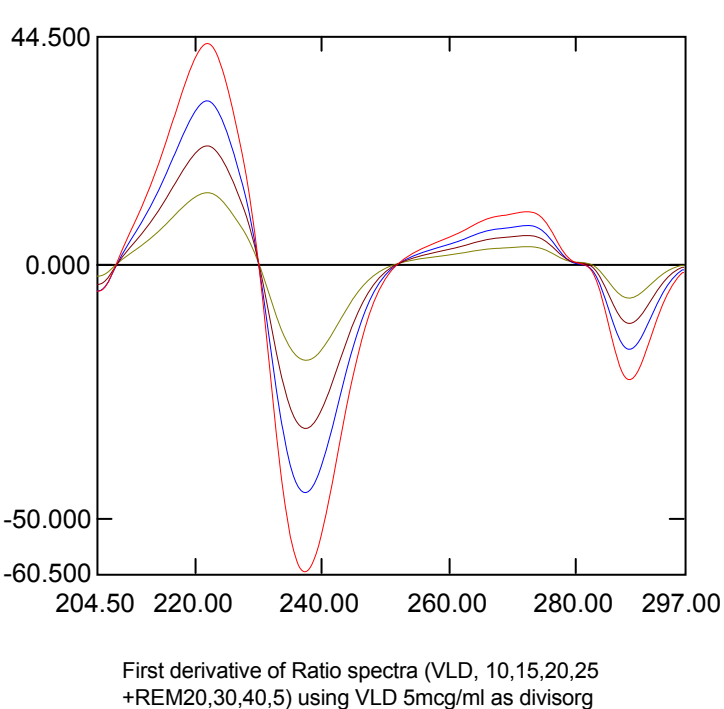

Supplement: s1 [file s1]
